# Supplementary material for: Longitudinal follow-up by MR angiography reveals progressive dilatation of the distal aorta after aortic root replacement in Marfan syndrome
Source: Springer Nature journal article supplement (doi:10.1007/s00330-023-09684-z), 2023-05-09
Supplement: MOESM1 [file 25336374]

## ELECTRONIC SUPPLEMENTARY MATERIAL

### Longitudinal follow-up by MR angiography reveals progressive dilatation of the distal aorta after aortic root replacement in Marfan syndrome

**Appendix:** Detailed results for the multiple regression models adjusted for medication, sex and BMI.

| Groups                      | Effects                                  | <i>Estimated Coefficient</i> | <i>95% CI</i>  | <i>p-value</i> |
|-----------------------------|------------------------------------------|------------------------------|----------------|----------------|
| <b>Annulus</b>              | Age at measurement                       | 0.093                        | 0.064, 0.122   | <0.001         |
|                             | Group: with surgery                      | 2.963                        | 1.149, 4.769   | 0.002          |
|                             | Antihypertensive medication: yes         | 0.296                        | -0.250, 0.852  | 0.291          |
|                             | Sex: male                                | 2.970                        | 1.843, 4.094   | <0.001         |
|                             | BMI                                      | 0.078                        | 0.033, 0.122   | <0.001         |
|                             | Age at measurement x Group: with surgery | -0.056                       | -0.108, -0.005 | 0.0035         |
| <b>Sinuses of Valsalva</b>  | Age at measurement                       | 0.209                        | 0.168, 0.250   | <0.001         |
|                             | Group: with surgery                      | -0.235                       | -2.644, 2.149  | 0.848          |
|                             | Antihypertensive medication: yes         | 0.360                        | -0.407, 1.139  | 0.356          |
|                             | Sex: male                                | 3.348                        | 1.742, 4.950   | <0.001         |
|                             | BMI                                      | 0.128                        | 0.066, 0.190   | <0.001         |
|                             | Age at measurement x Group: with surgery | -0.176                       | -0.247, -0.105 | <0.001         |
| <b>Sinutubular junction</b> | Age at measurement                       | 0.145                        | 0.117, 0.174   | <0.001         |
|                             | Group: with surgery                      | 2.094                        | 0.283, 3.900   | 0.026          |
|                             | Antihypertensive medication: yes         | 0.221                        | -0.452, 0.899  | 0.519          |
|                             | Sex: male                                | 2.597                        | 1.562, 3.633   | <0.001         |
|                             | BMI                                      | 0.059                        | 0.005, 0.116   | 0.034          |
|                             | Age at measurement x Group: with surgery | -0.092                       | -0.141, -0.044 | <0.001         |
| <b>Mid-ascending aorta</b>  | Age at measurement                       | 0.112                        | 0.080, 0.144   | <0.001         |
|                             | Group: with surgery                      | 1.451                        | -0.532, 3.428  | 0.155          |
|                             | Antihypertensive medication: yes         | -0.127                       | -0.801, 0.543  | 0.712          |
|                             | Sex: male                                | 2.540                        | 1.260, 3.820   | <0.001         |
|                             | BMI                                      | 0.020                        | -0.034, 0.077  | 0.469          |
|                             | Age at measurement x Group: with surgery | -0.041                       | -0.096, 0.014  | 0.146          |
| <b>Proximal aortic arch</b> | Age at measurement                       | 0.104                        | 0.068, 0.141   | <0.001         |
|                             | Group: with surgery                      | -6.437                       | -8.933, -3.896 | <0.001         |
|                             | Antihypertensive medication: yes         | 0.343                        | -0.508, 1.171  | 0.419          |
|                             | Sex: male                                | 1.554                        | 0.322, 2.786   | 0.016          |
|                             | BMI                                      | 0.018                        | -0.051, 0.090  | 0.615          |
|                             | Age at measurement x Group: with surgery | 0.193                        | 0.128, 0.255   | <0.001         |

|                                          |                                          |         |                 |        |
|------------------------------------------|------------------------------------------|---------|-----------------|--------|
|                                          | surgery                                  |         |                 |        |
| <b>Mid-aortic arch</b>                   | Age at measurement                       | 0.096   | 0.063, 0.129    | <0.001 |
|                                          | Group: with surgery                      | -9.811  | -12.030, -7.514 | <0.001 |
|                                          | Antihypertensive medication: yes         | -0.092  | -0.895, 0.704   | 0.823  |
|                                          | Sex: male                                | 1.046   | -0.069, 2.158   | 0.071  |
|                                          | BMI                                      | 0.048   | -0.018, 0.116   | 0.159  |
|                                          | Age at measurement x Group: with surgery | 0.267   | 0.206, 0.324    | <0.001 |
| <b>Prox. descending thoracic aorta 1</b> | Age at measurement                       | 0.087   | 0.055, 0.120    | <0.001 |
|                                          | Group: with surgery                      | -9.932  | -12.180, -7.599 | <0.001 |
|                                          | Antihypertensive medication: yes         | 0.414   | -0.431, 1.231   | 0.326  |
|                                          | Sex: male                                | 0.939   | -0.264, 2.139   | 0.133  |
|                                          | BMI                                      | 0.047   | -0.019, 0.116   | 0.165  |
|                                          | Age at measurement x Group: with surgery | 0.304   | 0.244, 0.361    | <0.001 |
| <b>Prox. descending thoracic aorta 2</b> | Age at measurement                       | 0.097   | 0.065, 0.130    | <0.001 |
|                                          | Group: with surgery                      | -8.589  | -10.736, -6.423 | <0.001 |
|                                          | Antihypertensive medication: yes         | -0.137  | -0.900, 0.621   | 0.724  |
|                                          | Sex: male                                | 1.419   | 0.043, 2.796    | 0.047  |
|                                          | BMI                                      | 0.037   | -0.023, 0.100   | 0.231  |
|                                          | Age at measurement x Group: with surgery | 0.330   | 0.272, 0.387    | <0.001 |
| <b>Mid-descending aorta</b>              | Age at measurement                       | 0.071   | 0.041, 0.101    | <0.001 |
|                                          | Group: with surgery                      | -10.947 | -12.822, -8.989 | <0.001 |
|                                          | Antihypertensive medication: yes         | -0.210  | -1.035, 0.610   | 0.617  |
|                                          | Sex: male                                | 1.075   | -0.117, 2.266   | 0.078  |
|                                          | BMI                                      | 0.077   | 0.010, 0.145    | 0.023  |
|                                          | Age at measurement x Group: with surgery | 0.358   | 0.304, 0.409    | <0.001 |
| <b>Diaphragmatic aorta</b>               | Age at measurement                       | 0.072   | 0.045, 0.100    | <0.001 |
|                                          | Group: with surgery                      | -6.614  | -8.392, -4.777  | <0.001 |
|                                          | Antihypertensive medication: yes         | -0.057  | -0.672, 0.551   | 0.855  |
|                                          | Sex: male                                | 0.782   | -0.138, 1.696   | 0.098  |
|                                          | BMI                                      | 0.038   | -0.014, 0.092   | 0.147  |
|                                          | Age at measurement x Group: with surgery | 0.195   | 0.145, 0.243    | <0.001 |
| <b>Abdominal aorta</b>                   | Age at measurement                       | 0.073   | 0.047, 0.101    | <0.001 |
|                                          | Group: with surgery                      | -5.757  | 7.566, -3.861   | <0.001 |
|                                          | Antihypertensive medication: yes         | -0.010  | -0.667, 0.643   | 0.976  |
|                                          | Sex: male                                | 0.409   | -0.492, 1.304   | 0.374  |
|                                          | BMI                                      | 0.037   | -0.018, 0.094   | 0.188  |
|                                          | Age at measurement x Group: with surgery | 0.171   | 0.122, 0.216    | <0.001 |
